# Supplementary material
Source: publisher figshare collection journal article supplement (https://karger.figshare.com/ndownloader/files/6530205)
Supplement: Supplementary file 1 [file 6530205]

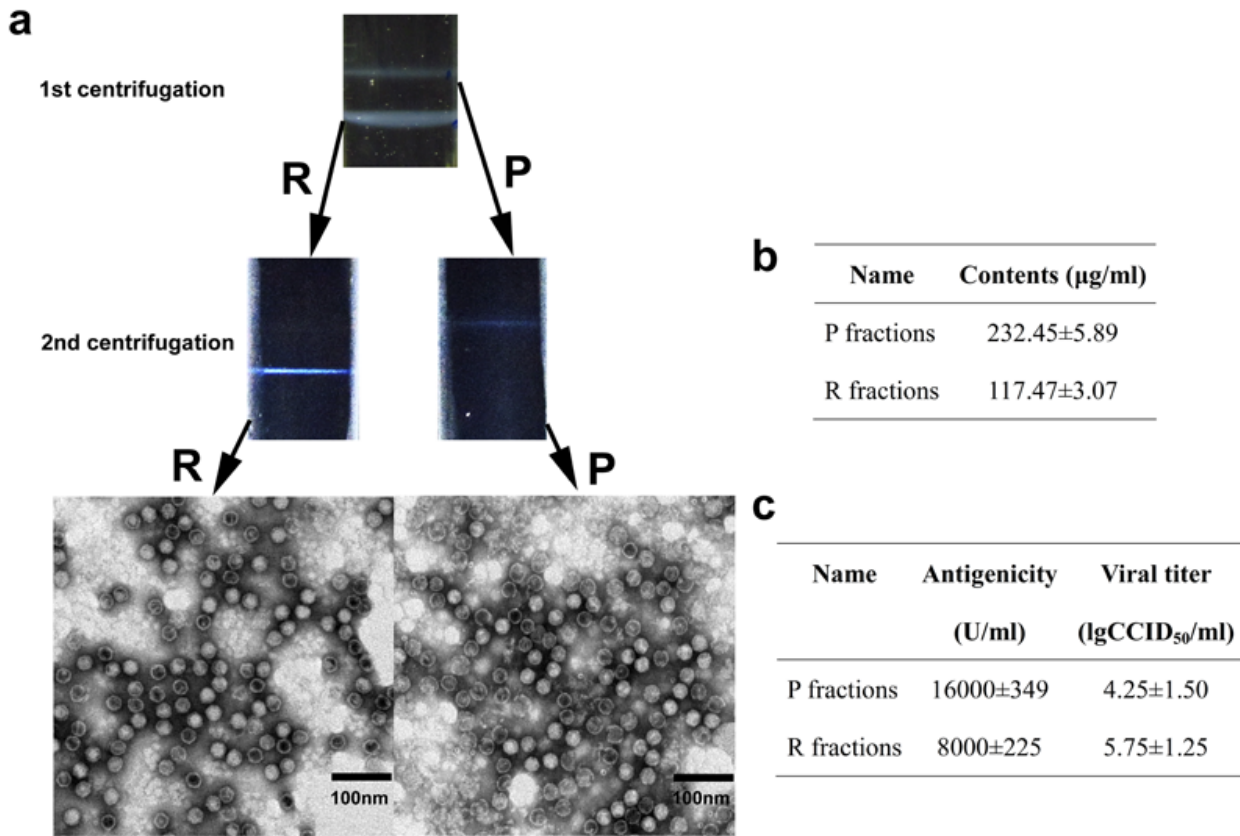

**Supplemental Fig. 1 Characterization of the two virion fractions.**

a: The virion fractions purified by iodixanol gradient centrifugation. The upper layer was located on ~fraction33, and the lower layer was on ~fraction38. The crude CVA16 concentrate was loaded onto a 10-60% continuous iodixanol gradient and centrifuged at 38,000 rpm for 5 hours using a SW41Ti rotor. The fractions were shown by a beam of light in a darkroom. After the first iodixanol centrifugation, the fractions of each visible band were collected, and each fraction was loaded onto a new 10-60% continuous iodixanol gradient for a second round under the same conditions. Each fraction is observed by electron microscopic observations (EM). The bar represents 100 nm.

b: The protein from the P and R fractions was determined using a BCA protein assay kit. The values (Mean± SD) are the means of three independent experiments.

c: The assay of antigenicity and viral titer. The antigenicity and viral titers of the two virions were detected setting the proteins of the P and R fractions at some level (56 µg/ml). The viral antigen titers were determined by an ELISA assay with anti-CA16 polyclonal antiserum. The viral titration was determined by a microscale assay. The values (Mean± SD) are the average of three independent experiments.

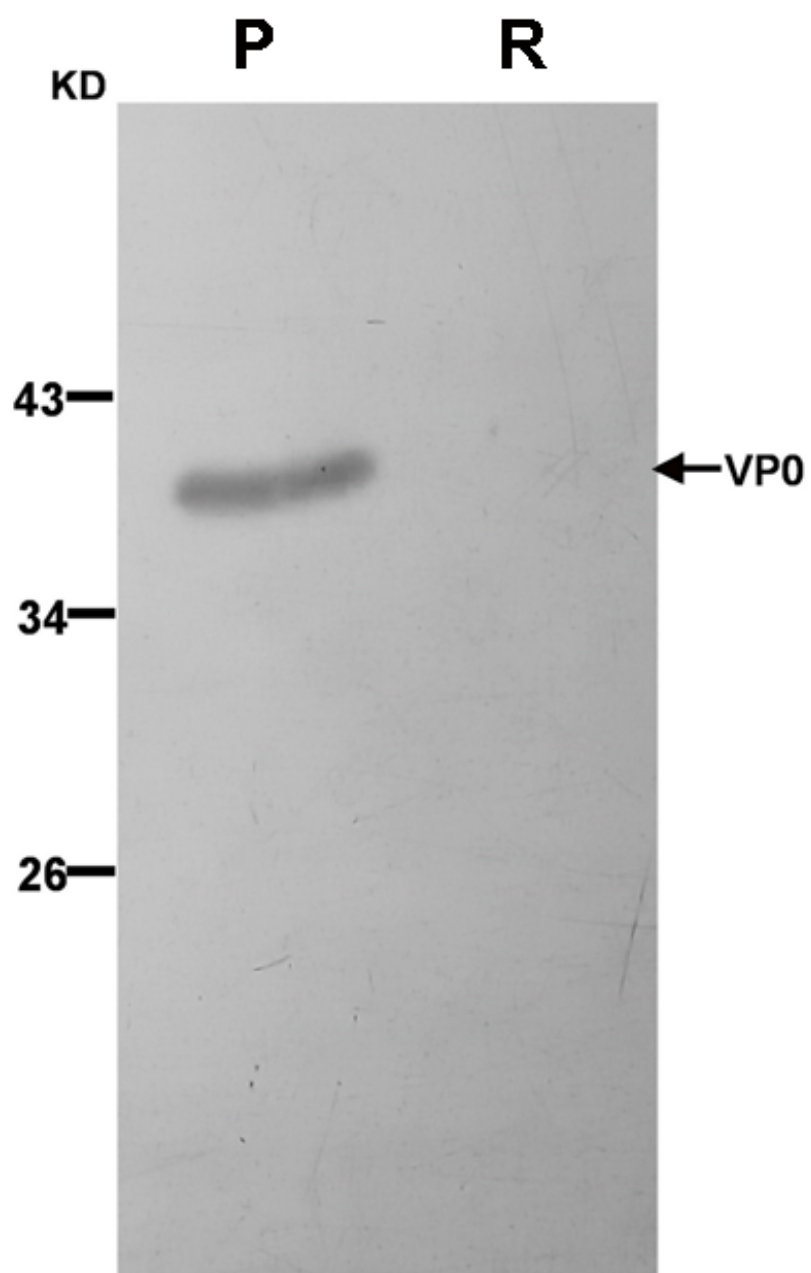

**Supplemental Fig. 2 Western blots of the two virion fractions.**

The CA16 VP0 protein of the P virion fraction (P) and the R virion fraction (R) were detected by western blot using rabbit anti-VP4 serum which was found to cross-react with VP0.
